# Supplementary material
Source: PubMed Central journal article supplement (PMC4210333)
Supplement: pnas.201410873SI.pdf [file pnas.201410873SI.pdf]

# Supporting Information

Salsi et al. 10.1073/pnas.1410873111

## SI Materials and Methods

**Materials and Sample Preparation.** Maleimide derivatives of the Cy3 and Cy5 (Combinix) fluorescent dyes were used for labeling EF-G and S12 as previously described (1). A cysteine-free variant of EF-G (C113D, C265A, C397S) and a single-cysteine EF-G variant (K541C) that were cloned into the pET-24 expression vector were kindly provided by Harry Noller (University of California, Santa Cruz) (2). A single-cysteine EF-G variant (N538C) was created by site-directed mutagenesis of a cysteine-free variant of EF-G. The H92A substitution was introduced into wild type and K541C variants of EF-G. Different variants of 6-histidine-tagged EF-G were expressed, purified, and labeled as previously described (2, 3). A single-cysteine variant of ribosomal protein S12 (C26S/C33A/C52A/C103T/L48C) was conjugated with Cy3 and incorporated into 30S subunits by *in vitro* reconstitution from purified 16S rRNA and the other 19 individually purified ribosomal proteins according to published procedures (1, 4).

**Preparation of Ribosomal Complexes for smFRET Experiments.** All ribosomal complexes used for imaging were assembled in polyamine buffer (20 mM Hepes-KOH, pH 7.5, 6 mM MgCl<sub>2</sub>, 150 mM NH<sub>4</sub>Cl, 6 mM β-mercaptoethanol, 2 mM spermidine, 0.1 mM spermine). Ribosomal complexes carrying a single deacylated tRNA bound to the P site were assembled by incubating 300 nM 70S S12–Cy3-labeled ribosomes with 600 nM mRNA m291, preannealed to 800 nM biotin-labeled DNA primer, and 600 nM tRNA<sup>Met</sup> at 37 °C for 20 min. The antibiotic viomycin or hygromycin B was eventually added (0.5 mM) with an additional incubation at 37 °C for 10 min. The pretranslocation complex was assembled by incubation of 0.5 μM 70S–Cy3-labeled ribosomes with 1 μM mRNA m291 preannealed to 1.3 μM biotin-labeled DNA primer, and 1 μM *N*-acetyl-Met-tRNA<sup>Met</sup> at 37 °C for 20 min followed by incubation with a 1 μM EF-Tu-GTP-Phe-tRNA<sup>Phe</sup> ternary complex, at 37 °C for 15 min. The ternary complex was preassembled by incubating 20 μM EF-Tu with 2 mM GTP in polyamine buffer at 37 °C for 10 min, followed by an additional incubation with 3 μM Phe-tRNA<sup>Phe</sup> at 37 °C for 5 min. The antibiotic viomycin or hygromycin B (0.5 mM when present) was added simultaneously with the ternary complex. Ribosomal complexes were subsequently diluted to a final concentration of 1 nM and immobilized in the sample chamber assembled from quartz microscope slides and glass coverslips coated with a mixture of m-PEG and biotin-PEG and pretreated with neutravidin (0.2 mg/mL). Then, Cy5-labeled EF-G (up to 10 nM) was added to S12–Cy3-labeled ribosomes in the presence of GTP (0.5 mM) or GDPNP (3 mM). Fusidic acid was 40 μM when present. Viomycin and hygromycin B were 0.5 mM when present. To prevent photobleaching, all samples were imaged in polyamine buffer (50 mM Hepes-KOH, pH 7.5, 6 mM MgCl<sub>2</sub>, 150 mM NH<sub>4</sub>Cl, 6 mM β-mercaptoethanol, 2 mM spermidine, 0.1 mM spermine) containing an oxygen-scavenging system (0.8 mg/mL glucose oxidase, 0.625% glucose, 0.02 mg/mL catalase, and 1.5 mM Trolox). Trolox was used to eliminate Cy5 blinking. FRET values did not depend on illumination intensity, which only affected the signal-to-noise ratio.

**Single-Molecule FRET Data Acquisition and Analysis.** Single-molecule FRET measurements were essentially taken as previously described (5, 6). An Olympus IX71 inverted microscope, equipped with a UPlanApo 60×/1.20 w objective lens, a 532-nm laser (Spectra-Physics) for excitation of Cy3 dyes, and a 642-nm laser (Spectra-Physics) for excitation of Cy5 dyes was used. Total

internal reflection (TIR) was obtained by a quartz prism (ES-KMA Optics). Fluorescence emission was split into Cy3 and Cy5 fluorescence using a dual view imaging system DV2 (Photometrics) equipped with a 630-nm dichroic mirror and recorded via an Andor iXon+ EMCCD camera. Movies were recorded using the Single software (downloaded from Prof. Taekjip Ha's laboratory website at the University of Illinois, Urbana-Champaign, physics.illinois.edu/cplc/software) (5), with the exposure time set at 100 ms. Data acquisition was carried out at room temperature. In equilibrium experiments, we typically took up to seven 5-min-long movies while imaging different sections of the slide for each sample. When EF-G was flowed into the sample chamber during imaging, one 10-min-long movie was acquired. EF-G was delivered using a J-KEM 1250 syringe pump. Before each measurement, we checked for nonspecific binding by adding fluorescently labeled ribosomes and EF-G to the slide in the absence of neutravidin and imaging the slide. Nonspecific binding was virtually absent. To minimize background fluorescence, our smFRET measurements were typically carried out at a 10-nM concentration of EF-G, which is below the previously reported 30 nM  $K_D$  for EF-G binding to the ribosome (7).

Collected datasets were processed with IDL and Matlab software, using scripts downloaded from a freely available source: physics.illinois.edu/cplc/software. Apparent FRET efficiencies ( $E_{app}$ ) were calculated from the emission intensities of donor ( $I_{Cy3}$ ) and acceptor ( $I_{Cy5}$ ) as follows:  $E_{app} = I_{Cy5}/[I_{Cy5} + I_{Cy3}]$ . The FRET distribution histograms were built from traces that showed single-step disappearance for both Cy3 and Cy5 fluorescence intensities using a Matlab script generously provided by Prof. Peter Cornish (University of Missouri, Columbia). Single-step disappearance of acceptor signal, which was due to either photobleaching or EF-G disassociation, resulting in a reciprocal increase in donor fluorescence indicated the presence of an energy transfer before acceptor signal disappearance. We had about 15–25 traces per movie that fit this selection criterion. The relatively low number of smFRET traces per movie is due to the scarcity of EF-G binding events that likely is a result of using a concentration of EF-G below the  $K_D$  for EF-G binding to the ribosome (see above). All histograms were smoothed with a five-point window and fitted to Gaussian distributions using Origin software (OriginLab). Fitting residuals were random.

## Stopped-Flow Measurements of Pre-Steady-State Translocation

**Kinetics.** Kinetics of mRNA translocation were measured as previously described with minor modifications (8–10). Pretranslocation complexes were constructed by the incubation of 70S ribosomes (1 μM) with fluorescein-labeled mRNA (5'-GGC AAG GAG GUA AAA AUG UUU AAA-3' fluorescein, synthesized by Dharmacon RNAi Technologies, 0.85 μM) and deacylated tRNA<sup>Met</sup> (2 μM) in polyamine buffer (30 mM Hepes-KOH, pH 7.6, 150 mM NH<sub>4</sub>Cl, 6 mM MgCl<sub>2</sub>, 2 mM spermidine, 0.1 mM spermine, 6 mM β-mercaptoethanol) for 20 min at 37 °C, followed by an incubation with *N*-acetyl-Phe-tRNA<sup>Phe</sup> (1.5 μM) for 30 min at 37 °C. Pretranslocation ribosomes were mixed with wild type or mutant variants of EF-G and GTP using an Applied Photophysics stopped-flow fluorometer. Final concentrations after mixing were: 35 nM ribosomes, 0.5 μM EF-G, and 0.5 mM GTP. Fluorescein was excited at 480 nm and fluorescence emission was detected using a 515-nm long-pass filter. All stopped-flow experiments were done at 23 °C; monochromator slits were adjusted to 9.3 nm. Translocation of mRNA resulted in partial quenching of fluorescein coupled to the 3' end of the mRNA (8). Time traces were analyzed using

Pro-Data Viewer software (Applied Photophysics). As reported previously (9, 11, 12), the kinetics of mRNA translocation are clearly biphasic and are best fitted to the sum of two exponentials, corresponding to the apparent rate constants  $k_1$  and  $k_2$ . Although the biphasic character of fluorescence changes associated with mRNA translocation is well documented, the physical basis of this phenomenon remains unclear. The rate of translocation was defined as the weighted average rate constant  $k_{av}$  (Table S1), calculated as the sum of  $k_1$  and  $k_2$  normalized to their respective contributions to the total amplitude of fluorescence change [ $k_{av} = (k_1 \times A_1 + k_2 \times A_2)/(A_1 + A_2)$ ] (9).

**Multiple-Turnover Translocation Assay.** Translocation activity of single-labeled EF-G constructs was measured by puromycin reactivity of ribosome-bound tRNA (Fig. S2). Pretranslocation ribosome complexes were assembled using 70S ribosomes (0.2  $\mu$ M) incubated with mRNA m32 (0.4  $\mu$ M) and deacylated tRNA<sup>Met</sup> (0.4  $\mu$ M) in polyamine buffer (see above) for 20 min at 37 °C. Radiolabeled *N*-acetyl-[<sup>3</sup>H]Phe-tRNA<sup>Phe</sup> (0.35  $\mu$ M) was subsequently added to the mixture and incubated for another 20 min at 37 °C. Translocation was catalyzed by the addition of GTP (0.5 mM) and EF-G at concentrations varying between 1 and 200 nM, followed by incubation for 2 min at 37 °C, i.e., under initial velocity conditions for 1–10 nM EF-G. Puromycin (1 mM) was then added, followed by incubation for 3 min at 37 °C. The *N*-acetyl-[<sup>3</sup>H]Phe-puromycin product was separated from the reaction mixture by the addition of 70  $\mu$ L extraction buffer (MgSO<sub>4</sub>-saturated 0.3 M NaOAc, pH 5.3) to a final reaction volume of 80  $\mu$ L, and then 1 mL ethyl acetate was added. The ethyl acetate fraction was separated from the aqueous phase by centrifugation and incubated with scintillation fluid, followed by the measurement of radioactivity.

**Toeprinting Analysis.** Toeprinting experiments were performed as previously described (13, 14). The pretranslocation complexes in

Figs. S6 and S8 were assembled by incubating 70S ribosomes (1  $\mu$ M) with *N*-acetyl-Met-tRNA<sup>Met</sup> (2  $\mu$ M) and mRNA m291 (13) (2  $\mu$ M) preannealed to [<sup>32</sup>P]-labeled primer (13) for 20 min at 37 °C. Then, 1  $\mu$ M EF-Tu-GTP-Phe-tRNA<sup>Phe</sup> ternary complexes were added to P-site tRNA-bound complexes followed by incubation at 37 °C for 15 min. The ternary complex was preassembled by the incubation of 10  $\mu$ M EF-Tu with 2 mM GTP at 37 °C for 10 min, followed by the incubation with 3  $\mu$ M Phe-tRNA<sup>Phe</sup> at 37 °C for 5 min. A fraction of pretranslocation ribosomes was preincubated with viomycin (0.2 mM) for 5 min at room temperature. Translocation was carried out by the incubation of pretranslocation complexes (0.5  $\mu$ M) with 3  $\mu$ M EF-G in the presence of 0.5 mM GTP and 0.25 mM fusidic acid for 20 min at room temperature (Fig. S6) or 10 min at 37 °C (Fig. S8). The pretranslocation complex in Fig. S3 was assembled by incubating 70S ribosomes (1  $\mu$ M) with tRNA<sup>Tyr</sup> (2  $\mu$ M) and mRNA m293 (13) (2  $\mu$ M) preannealed to [<sup>32</sup>P]-labeled primer (13) for 20 min at 37 °C. Then, *N*-acetyl-Phe-tRNA<sup>Phe</sup> (2  $\mu$ M) was added to P-site tRNA-bound complexes followed by incubation for 30 min at 37 °C. Translocation was carried out by incubation of pretranslocation complexes with 1.5  $\mu$ M EF-G and 0.5 mM GTP.

**GTPase Assay.** The rate of GTP hydrolysis by EF-G (H92A) was assayed using  $\gamma$ -<sup>32</sup>P-labeled GTP according to previous studies (15). Vacant ribosomes (0.2  $\mu$ M) were incubated with or without EF-G (0.5  $\mu$ M) in reaction buffer [90 mM Hepes-KOH (pH 7.5), 100 mM NH<sub>4</sub>Cl, 20 mM Mg(OAc)<sub>2</sub>] with [ $\gamma$ -<sup>32</sup>P]-GTP (10  $\mu$ M) for various time points at room temperature. Following GTP hydrolysis, the reaction was quenched by adding 10  $\mu$ L of the reaction mixture to 390  $\mu$ L of 5% (wt/vol) activated charcoal resuspended in 50 mM NaH<sub>2</sub>PO<sub>4</sub>. Inorganic phosphate was separated from the reaction mixture by centrifugation at 7,000  $\times$  *g* for 10 min, and 25  $\mu$ L of the supernatant was added to scintillation fluid, followed by the measurement of radioactivity.

1. Hickerson R, Majumdar ZK, Baucom A, Clegg RM, Noller HF (2005) Measurement of internal movements within the 30 S ribosomal subunit using Förster resonance energy transfer. *J Mol Biol* 354(2):459–472.
2. Wilson KS, Noller HF (1998) Mapping the position of translational elongation factor EF-G in the ribosome by directed hydroxyl radical probing. *Cell* 92(1):131–139.
3. Ermolenko DN, et al. (2007) Observation of intersubunit movement of the ribosome in solution using FRET. *J Mol Biol* 370(3):530–540.
4. Culver GM, Noller HF (1999) Efficient reconstitution of functional Escherichia coli 30S ribosomal subunits from a complete set of recombinant small subunit ribosomal proteins. *RNA* 5(6):832–843.
5. Roy R, Hohng S, Ha T (2008) A practical guide to single-molecule FRET. *Nat Methods* 5(6):507–516.
6. Cornish PV, Ermolenko DN, Noller HF, Ha T (2008) Spontaneous intersubunit rotation in single ribosomes. *Mol Cell* 30(5):578–588.
7. Lancaster L, Lambert NJ, Maklan EJ, Horan LH, Noller HF (2008) The sarcin-ricin loop of 23S rRNA is essential for assembly of the functional core of the 50S ribosomal subunit. *RNA* 14(10):1999–2012.
8. Studer SM, Feinberg JS, Joseph S (2003) Rapid kinetic analysis of EF-G-dependent mRNA translocation in the ribosome. *J Mol Biol* 327(2):369–381.
9. Ermolenko DN, Noller HF (2011) mRNA translocation occurs during the second step of ribosomal intersubunit rotation. *Nat Struct Mol Biol* 18(4):457–462.
10. Svidritskiy E, Ling C, Ermolenko DN, Korostelev AA (2013) Blasticidin S inhibits translation by trapping deformed tRNA on the ribosome. *Proc Natl Acad Sci USA* 110(30):12283–12288.
11. Peske F, Savelsbergh A, Katunin VI, Rodnina MV, Wintermeyer W (2004) Conformational changes of the small ribosomal subunit during elongation factor G-dependent tRNA-mRNA translocation. *J Mol Biol* 343(5):1183–1194.
12. Munro JB, et al. (2010) Spontaneous formation of the unlocked state of the ribosome is a multistep process. *Proc Natl Acad Sci USA* 107(2):709–714.
13. Fredrick K, Noller HF (2002) Accurate translocation of mRNA by the ribosome requires a peptidyl group or its analog on the tRNA moving into the 30S P site. *Mol Cell* 9(5):1125–1131.
14. Spiegel PC, Ermolenko DN, Noller HF (2007) Elongation factor G stabilizes the hybrid-state conformation of the 70S ribosome. *RNA* 13(9):1473–1482.
15. Walter JD, Hunter M, Cobb M, Traeger G, Spiegel PC (2012) Thiostrepton inhibits stable 70S ribosome binding and ribosome-dependent GTPase activation of elongation factor G and elongation factor 4. *Nucleic Acids Res* 40(1):360–370.



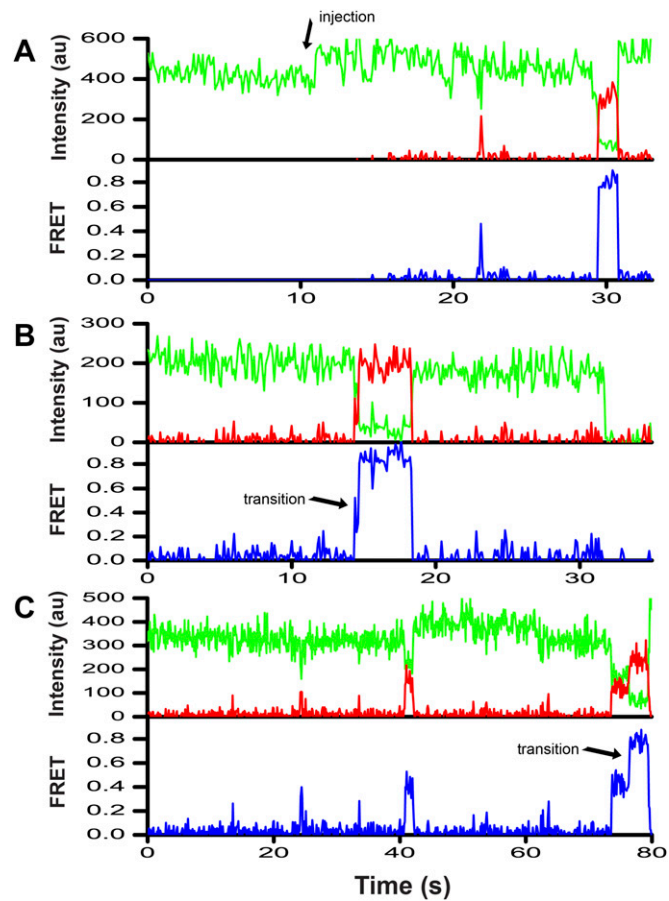

**Fig. S4.** Sampling of transient  $\sim 0.5$  FRET state in smFRET traces in the absence of translocation inhibitors. EF-G-541-Cy5-GTP-Fus (A and B) or EF-G-538-Cy5-GTP-Fus (C) was added to S12-Cy3 labeled pretranslocation ribosomes. The traces show fluorescence intensities observed for Cy3 (green) and Cy5 (red) and the calculated apparent FRET efficiency (blue). All traces show transient sampling of a  $\sim 0.5$  FRET state before the appearance of a 0.8 FRET state. The transition from the  $\sim 0.5$  to the  $\sim 0.8$  FRET state in B and C likely corresponds to a transition from the pre- to posttranslocation conformation of EF-G-ribosome complex.







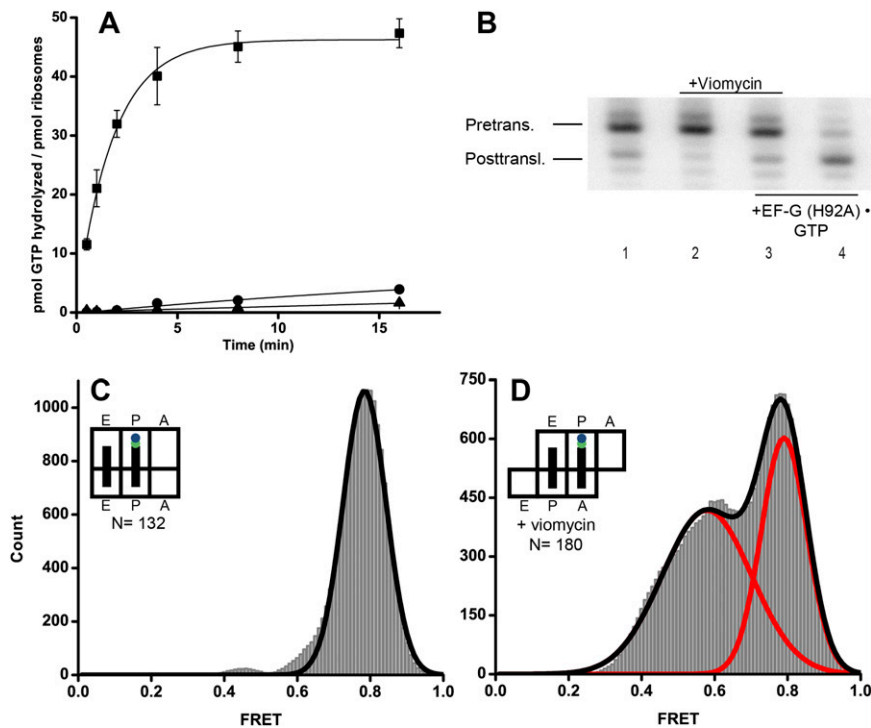

**Fig. 58.** The effects of substituting histidine 92 with alanine on structural rearrangements, GTPase, and translocation activity of EF-G. (A) Kinetics of ribosome-dependent multiple-turnover GTP hydrolysis by wild type (squares) and H92A (circles) variants of EF-G. Kinetics of GTP hydrolysis by wild-type EF-G in the absence of the ribosome are shown by triangles. Exponential fits are shown by black lines. (B) Toeprinting translocation assay. The pretranslocation complex (lanes 1 and 2) was constructed as in toeprinting experiments of Fig. 56 and then incubated with EF-G (H92A) and GTP (lanes 3 and 4) for 10 min at 37 °C. In lanes 2 and 3, the ribosome was preincubated with viomycin. (C and D) Histograms showing distribution of FRET values in EF-G-ribosomal complexes. EF-G (H92A)-541-Cy5-GTP was added to S12-Cy3-labeled pretranslocation ribosomes containing tRNA<sup>Met</sup> in the P site and *N*-acetyl-Met-Phe-tRNA<sup>Phe</sup> in the A site in the absence of translocation inhibitors (C) or the presence of viomycin (D). *N* is the number of EF-G binding events in single-molecule traces compiled for each histogram. Red lines represent Gaussian fits; the black line represents the sum of two Gaussians.

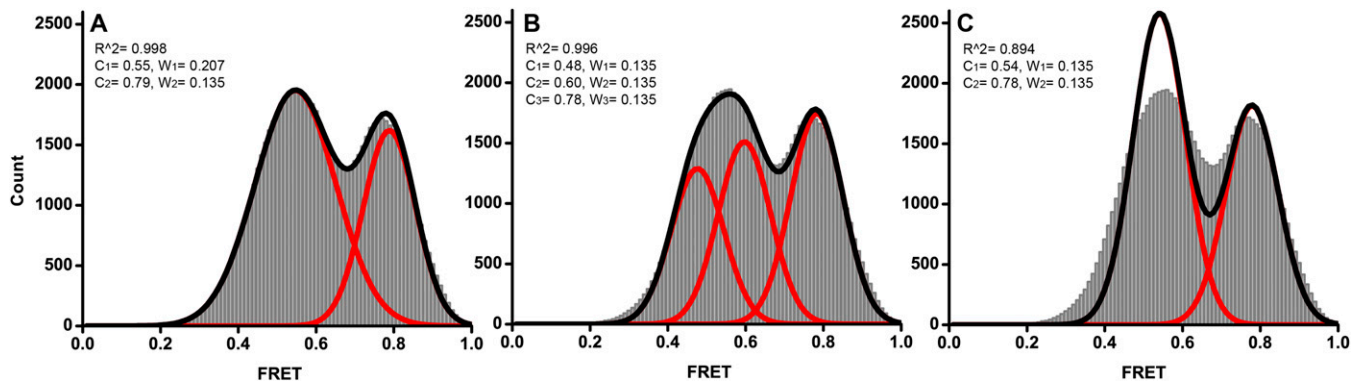

**Fig. 59.** Statistical analysis of the FRET distribution histogram obtained for EF-G-541-Cy5-GTP incubated with S12-Cy3-labeled pretranslocation ribosomes in the presence of fusidic acid and viomycin (Fig. 3C of the main text). The FRET distribution histogram built from 869 traces was fitted to two (A and C) or three (B) Gaussians with unconstrained (A) or self-consistent (B and C) widths. Red lines represent Gaussian fits; the black line represents the sum of Gaussians. The  $R^2$  value, the center of the fitted peaks (c) and the width of the fitted peaks (w) are reported within each panel. Fitting the FRET distribution to three Gaussians (B) instead of to two Gaussians with self-consistent widths (C) satisfies the *F* test ( $P < 0.01$ ).

**Table S1. Translocation activity of fluorescently labeled EF-G constructs under pre-steady-state conditions**

| EF-G variant        | $k_1, s^{-1}$ | $k_2, s^{-1}$   | $A_1/(A_1 + A_2)$ | $k_{av}, s^{-1}$ |
|---------------------|---------------|-----------------|-------------------|------------------|
| WT                  | $5.4 \pm 0.9$ | $0.7 \pm 0.1$   | $0.49 \pm 0.03$   | $3.0 \pm 0.5$    |
| EF-G 538-Cy5        | $7.1 \pm 3.0$ | $0.7 \pm 0.1$   | $0.40 \pm 0.02$   | $3.3 \pm 1.3$    |
| EF-G 541-Cy5        | $5.4 \pm 1.6$ | $0.7 \pm 0.1$   | $0.34 \pm 0.04$   | $2.3 \pm 0.7$    |
| EF-G (H92A) 541-Cy5 | $2.0 \pm 0.5$ | $0.10 \pm 0.02$ | $0.13 \pm 0.01$   | $0.4 \pm 0.1$    |

Rates of translocation catalyzed by Cy5-labeled mutant variants of EF-G were measured in pre-steady-state stopped-flow kinetic experiments as described in *SI Materials and Methods*. EF-G and ribosome concentrations were 0.5  $\mu$ M and 35 nM, respectively.  $k_1$  and  $k_2$  are the rate constants of double-exponential fits of the mRNA translocation data;  $A_1/(A_1 + A_2)$  is the relative contribution of the faster phase to the total amplitude of fluorescein quenching. Weighted average values ( $k_{av}$ ) for mRNA translocation rates were calculated by combining the rate constants derived from the two-exponential fits:  $k_{av} = (k_1A_1 + k_2A_2)/(A_1 + A_2)$ .
